# Supplementary material for: Conductive nanocomposite hydrogels for flexible wearable sensors
Source: Royal Society of Chemistry journal article supplement (doi:10.1039/d3ta08069b), 2024-01-01
Supplement: d3ta08069b1.pdf [file d3ta08069b1.pdf]

## ***Supporting information***

### **Conductive Nanocomposite Hydrogels for Flexible Wearable Sensor**

Wen-Yan Guo,<sup>a</sup> Ming-Guo Ma<sup>a,b,\*</sup>

<sup>a</sup>*MOE Engineering Research Center of Forestry Biomass Materials and Bioenergy, Beijing Key Laboratory of Lignocellulosic Chemistry, Research Center of Biomass Clean Utilization, College of Materials Science and Technology, Beijing Forestry University, Beijing 100083, PR China. Email: [mg\\_ma@bjfu.edu.cn](mailto:mg_ma@bjfu.edu.cn)*

<sup>b</sup>*State Silica-based Materials Laboratory of Anhui Province, Bengbu 233000, PR China.*

#### **Abbreviated summary:**

Carbon Black (CB), Carbon Nanotube (CNT), Graphene Oxide (GO), Reduced Graphene Oxide (RGO), Polyaniline (PANI), Polypyrrole (PPy), Two-Dimensional (2D), Polyvinyl Alcohol (PVA), Polyacrylamide (PAM), Glycerol (Gly), Electrocardiograph (ECG), Electromyography (EMG), Carboxylated Multi-Walled CNTs (C-MWCNT), Bacterial Cellulose (BC), Tannic Acid (TA), B-Cyclodextrin (B-CD), N-Isopropylacrylamide (NIPAM), Triboelectric Nanogenerator (TENG), Polymer Polydopamine (PDA), Liquid Metal (LM), Acrylic Acid (AA), Cellulose Nanocrystals (CNCs), Cellulose Nanofibers (CNFs), Polyaniline (PANI), Bacterial Nanocellulose (BNCs), Ethylene Glycol (EG), Polyethylene Glycol (PEG), Polyacrylic Acid (PAA), Pyrimidinone (UPy), Silver Nanoparticle (AgNP), Gold Nanoparticles (AuNPs), Silver Nanowires (AgNWs), Electromagnetic Interference (EMI), Nanogenic Fibrillated Cellulose (NFC), Diels-Alder (DA), Poly(3,4-Ethylenedioxythiophene): Sulfonated Lignin (PEDOT:PSS), Single-Walled CNT (SWCNT), Gelatin Methacrylate (GelMa), Amphipathic Proline (ZP).

**Table S1.** Properties and applications of composite conductive hydrogels with different nanofillers.

| Filler type                     | Nanomaterials | Stretchability | Conductivity           | Sensing types                           | Gauge Factor                                                                                                                                                                                 | Ref.                                                          |
|---------------------------------|---------------|----------------|------------------------|-----------------------------------------|----------------------------------------------------------------------------------------------------------------------------------------------------------------------------------------------|---------------------------------------------------------------|
|                                 |               | y              |                        |                                         |                                                                                                                                                                                              |                                                               |
| <b>Carbon-based nanofillers</b> | CB            | 643.2%         | 0.16 S m <sup>-1</sup> | Temperature and strain sensor           | 2.1 (0-600%);<br>TCR (-0.935% °C <sup>-1</sup> ).                                                                                                                                            | 52                                                            |
|                                 |               | 313%           | /                      | Strain and pressure sensor              | 0.725 (0-60%);<br>2.216 (60-145.2%);<br>5.01 (145.2-200%);<br>0.033kPa <sup>-1</sup> (0-29 kPa) ;<br>0.009kPa <sup>-1</sup> (29-172 kPa) ;<br>0.004kPa <sup>-1</sup> (172-337 kPa).          | 61                                                            |
|                                 |               | 710%           | /                      | Strain and pressure sensor              | 5.17 (0-160%);<br>9.21 (160-300%);<br>68.64 (300-355%);<br>0.229kPa <sup>-1</sup> (0-0.375 MPa) ;<br>0.0312 kPa <sup>-1</sup> (0.375-8.053 MPa) ;<br>0.0023kPa <sup>-1</sup> (8.053-15 MPa). | 53                                                            |
|                                 | CNTs          | 900%           | 0.19 S m <sup>-1</sup> | Strain sensor                           | 1.57 (0-50%);<br>2.86 (50-200%);<br>4.97 (200-400%);<br>7.8 (400-900%).                                                                                                                      | 54                                                            |
|                                 |               | 600%           | /                      | Temperature, strain and pressure sensor | 2.1 (0-600%);<br>TCR (3.81% °C <sup>-1</sup> ).                                                                                                                                              | 45                                                            |
|                                 | GO            | 657.5%         | 1.98 S m <sup>-1</sup> | Temperature, strain and pressure sensor | 2.59 (0-93%);<br>3.76 (93%-209%);<br>4.09 (209%-325%);<br>4.87 (325%-418%);<br>6.04 (418%-500%);<br>TCR (0.71% °C <sup>-1</sup> ).                                                           | 17                                                            |
|                                 |               | 10300%         | /                      | Strain sensor                           | 3.28 (0-600%);<br>7.25 (600-1500%);<br>13.45 (1500-4800%).                                                                                                                                   | 66                                                            |
|                                 |               | rGO            | 5000%                  | /                                       | Strain sensor                                                                                                                                                                                | 4.29 (0% -- 60%);<br>5.26 (60% --260%);<br>14.14 (260--550%). |

|                                  |                      |                       |                           |                                         |                                                                                                                                                                                                |             |
|----------------------------------|----------------------|-----------------------|---------------------------|-----------------------------------------|------------------------------------------------------------------------------------------------------------------------------------------------------------------------------------------------|-------------|
|                                  |                      | 2800%                 | 0.25 S m <sup>-1</sup>    | Strain and pressure sensor              | 1.77 (0-100%);<br>6.4 (100-600%);<br>9.86 (600-1000%).                                                                                                                                         | 69          |
| <b>Filler type</b>               | <b>Nanomaterials</b> | <b>Stretchability</b> | <b>Conductivity</b>       | <b>Sensing types</b>                    | <b>Gauge Factor</b>                                                                                                                                                                            | <b>Ref.</b> |
|                                  |                      | 600%                  | 0.6 S m <sup>-1</sup>     | Strain sensor                           | 0.9 (0-600%).                                                                                                                                                                                  | 40          |
|                                  | CNCs                 | 257.4%                | 2.3 mS cm <sup>-1</sup>   | Strain sensor                           | 1.98 (0-60%);<br>3.97 (60-200%).                                                                                                                                                               | 76          |
|                                  |                      | 3200%                 | 17.36 mS cm <sup>-1</sup> | Strain sensor                           | 1.76 (0-500%);<br>2.55 (5000-1000%);<br>3.27 (1000-1500%).                                                                                                                                     | 80          |
|                                  | CNFs                 | 696%                  | /                         | Temperature, strain and pressure sensor | 0.96 (0-100%);<br>1.57 (100-300%);<br>0.28 kPa <sup>-1</sup> (0-2 kPa);<br>0.0067 kPa <sup>-1</sup> (2-40 kPa);<br>TCR 4.66% °C <sup>-1</sup> (0-6°C);<br>TCR 0.63% °C <sup>-1</sup> (6-60°C). | 77          |
| <b>Polymer-based nanofillers</b> |                      | 925%                  | 995 mS·m <sup>-1</sup>    | Strain sensor                           | 0.6 (0-550%);<br>1.8 (550-710%);<br>4.6 (714-810%);<br>25.6 (810-873%).                                                                                                                        | 78          |
|                                  |                      | 991%                  | /                         | Temperature, strain and pressure sensor | 3.93 (0-75.63%);<br>9.01 (75.63-169.04%);<br>18.28 (169.04-268.9%);<br>TCR (-0.016 °C <sup>-1</sup> ).                                                                                         | 82          |
|                                  | PANI                 | 2590%                 | 3.35 S m <sup>-1</sup>    | Strain and pressure sensor              | 2.6 (0-300%);<br>7.8 (300-1210%);<br>17.9 (1210-1520%).                                                                                                                                        | 83          |
|                                  |                      | 700%                  | 13 S m <sup>-1</sup>      | Strain sensor                           | 3.4 (0-300%).                                                                                                                                                                                  | 87          |
|                                  | PPy                  | 641%                  | 1.13 S m <sup>-1</sup>    | Strain sensor                           | 1.98 (0-100%);<br>3.64 (100-200%);<br>4.98 (200-400%).                                                                                                                                         | 89          |
|                                  |                      | 523.3%                | 0.89 mS·cm <sup>-1</sup>  | Strain sensor                           | 2.1 (0-400%).                                                                                                                                                                                  | 84          |

| Filler type                            | Nanomaterials | Stretchability | Conductivity            | Sensing types                 | Gauge Factor                                                               | Ref. |
|----------------------------------------|---------------|----------------|-------------------------|-------------------------------|----------------------------------------------------------------------------|------|
| <b>Metal-based nanofillers</b>         | AgNPs         | 261%           | /                       | Temperature and strain sensor | 1.755 (0-250%);<br>TCR (-2.99% °C <sup>-1</sup> ).                         | 90   |
|                                        | AuNPs         | 470%           | 0.26 S m <sup>-1</sup>  | Strain sensor                 | 0.99 (0-350%).                                                             | 94   |
|                                        | AgNWs         | 1000%          | 83 S cm <sup>-1</sup>   | Strain sensor                 | /                                                                          | 36   |
|                                        | AuNPs         | 2000%          | /                       | Strain sensor                 | 0.144 (0-200%);<br>0.222 (200-600%);<br>0.303 (600-800%).                  | 95   |
|                                        |               | 1000%          | /                       | Strain sensor                 | 5.02 (0-200%);<br>44.85 (200-350%).                                        | 97   |
| <b>Two-dimensional material-MXenes</b> | MXenes        | 247%           | 56 mS m <sup>-1</sup>   | Strain sensor                 | 3.42 (0-50%);<br>4.77 (50-100%);<br>5.82 (100-180%).                       | 98   |
|                                        |               | 4600%          | /                       | Strain sensor                 | 1.63 (0-1200%);<br>3.45 (1200-3000%);<br>6.6 (3000-4500%).                 | 99   |
|                                        |               | 660%           | 0.016 S m <sup>-1</sup> | Strain and pressure sensor    | 4.12 (0-200% );<br>7.17 (200%-500%);<br>0.63 kPa <sup>-1</sup> (0-70 kPa). | 101  |
